# Supplementary material
Source: publisher figshare collection journal article supplement (https://sage.figshare.com/ndownloader/files/13276760)
Supplement: Supplementary file 1 [file 13276760]

**Supplementary material 2.** Prevalence of different diagnosis groups and diagnoses in different age groups in the Danish population at baseline*†

| **DIAGNOSES** | **18-39** | | **40-64** | | **65-79** | | **80+** | | **TOTAL** | |
| --- | --- | --- | --- | --- | --- | --- | --- | --- | --- | --- |
| **N** | **%** | **N** | **%** | **N** | **%** | **N** | **%** | **N** | **%** |
| **Total** | **1515182** | **38.0** | **1687368** | **42.3** | **575651** | **14.5** | **208008** | **5.2** | **3986209** | **100.0** |
| **Lung** | **19954** | **20.4** | **34110** | **34.9** | **32764** | **33.5** | **10896** | **11.1** | **97724** | **2.5** |
| COPD | 940 | 2.3 | 12609 | 30.4 | 21156 | 51.0 | 6747 | 16.3 | 41452 |  |
| Chronic bronchitis | 848 | 3.1 | 8594 | 31.4 | 12916 | 47.2 | 5004 | 18.3 | 27362 |  |
| Emphysema | 373 | 5.6 | 2232 | 33.7 | 3157 | 47.7 | 853 | 12.9 | 6615 |  |
| Asthma | 18547 | 36.5 | 19731 | 38.8 | 9895 | 19.5 | 2618 | 5.2 | 50791 |  |
|  |  |  |  |  |  |  |  |  |  |  |
| **Musculoskeletal** | **50199** | **17.1** | **138668** | **47.3** | **69923** | **23.8** | **34575** | **11.8** | **293365** | **7.4** |
| Arthritis | 2941 | 12.7 | 10537 | 45.5 | 7250 | 31.3 | 2414 | 10.4 | 23142 |  |
| Arthrosis | 4270 | 4.3 | 37708 | 38.0 | 36785 | 37.1 | 20424 | 20.6 | 99187 |  |
| Back diagnoses | 43519 | 24.7 | 94529 | 53.6 | 27275 | 15.5 | 10959 | 6.2 | 176282 |  |
| Osteoporosis | 312 | 1.5 | 5121 | 24.6 | 8299 | 39.8 | 7095 | 34.1 | 20827 |  |
|  |  |  |  |  |  |  |  |  |  |  |
| **Endocrine** | **13082** | **12.8** | **42621** | **41.6** | **32338** | **31.6** | **14404** | **14.1** | **102445** | **2.6** |
| Hypothyroidism | 1311 | 11.8 | 3683 | 33.2 | 3771 | 34.0 | 2316 | 20.9 | 11081 |  |
| Hyperthyroidism | 3147 | 13.6 | 9555 | 41.3 | 7050 | 30.5 | 3386 | 14.6 | 23138 |  |
| Diabetes | 8898 | 12.4 | 30455 | 42.5 | 22980 | 32.0 | 9394 | 13.1 | 71727 |  |
|  |  |  |  |  |  |  |  |  |  |  |
| **Mental**‡ | **62579** | **33.0** | **83081** | **43.9** | **26225** | **13.8** | **17578** | **9.3** | **189463** | **4.8** |
| Dementia | 303 | 1.4 | 3050 | 14.0 | 7471 | 34.4 | 10925 | 50.2 | 21749 |  |
| Alcohol | 14787 | 26.0 | 35575 | 62.5 | 5819 | 10.2 | 722 | 1.3 | 56903 |  |
| Mental diagnoses (PCRR) | 50670 | 40.4 | 52953 | 42.2 | 15003 | 12.0 | 6759 | 5.4 | 125385 |  |
|  |  |  |  |  |  |  |  |  |  |  |
| **Cancer** | **24901** | **21.6** | **44713** | **38.7** | **31725** | **27.5** | **14183** | **12.3** | **115522** | **2.9** |
|  |  |  |  |  |  |  |  |  |  |  |
| **Neurological** | **21960** | **18.1** | **42277** | **34.9** | **35625** | **29.4** | **21334** | **17.6** | **121196** | **3.0** |
| Stroke | 2561 | 3.7 | 20267 | 28.9 | 28724 | 41.0 | 18461 | 26.4 | 70013 |  |
| Multiple sclerosis | 1689 | 24.2 | 4331 | 62.0 | 873 | 12.5 | 90 | 1.3 | 6983 |  |
| Epilepsy | 12572 | 39.3 | 12620 | 39.5 | 4929 | 15.4 | 1850 | 5.8 | 31971 |  |
| Migraine | 6041 | 40.6 | 7480 | 50.3 | 1106 | 7.4 | 248 | 1.7 | 14875 |  |
| Parkinson disease | 28 | 0.5 | 734 | 14.0 | 2579 | 49.1 | 1912 | 36.4 | 5253 |  |
|  |  |  |  |  |  |  |  |  |  |  |
| **Gastrointestinal** | **25587** | **25.2** | **50776** | **50.0** | **19697** | **19.4** | **5407** | **5.3** | **101467** | **2.6** |
| Dyspepsia | 10908 | 23.4 | 23134 | 49.7 | 9756 | 21.0 | 2770 | 5.9 | 46568 |  |
| Crohn/colitis ulcerosa | 7946 | 39.2 | 8515 | 42.0 | 2955 | 14.6 | 870 | 4.3 | 20286 |  |
| Irritable bowel syndrome | 5163 | 28.9 | 8268 | 46.3 | 3337 | 18.7 | 1075 | 6.0 | 17843 |  |
| Chronic liver disease | 2432 | 13.7 | 10835 | 61.1 | 3740 | 21.1 | 721 | 4.1 | 17728 |  |
| Chronic pancreatitis | 601 | 11.5 | 3502 | 66.8 | 938 | 17.9 | 201 | 3.8 | 5242 |  |
|  |  |  |  |  |  |  |  |  |  |  |
|  |  |  |  |  |  |  |  |  |  |  |
|  |  |  |  |  |  |  |  |  |  |  |
|  |  |  |  |  |  |  |  |  |  |  |
|  |  |  |  |  |  |  |  |  |  |  |
| **DIAGNOSES** | **18-39** | | **40-64** | | **65-79** | | **80+** | | **TOTAL** | |
| **Cardiovascular** | **9040** | **4.1** | **74622** | **34.0** | **87280** | **39.8** | **48356** | **22.1** | **219298** | **5.5** |
| Ischemic heart disease | 2493 | 1.7 | 52271 | 36.6 | 59987 | 42.0 | 28083 | 19.7 | 142834 |  |
| Heart failure/arrhythmia | 5944 | 5.3 | 28789 | 25.7 | 44782 | 40.0 | 32556 | 29.0 | 112071 |  |
| Heart valve diagnoses | 1103 | 6.2 | 4949 | 27.8 | 7759 | 43.7 | 3964 | 22.3 | 17775 |  |
|  |  |  |  |  |  |  |  |  |  |  |
| **Genitourinary** | **7857** | **20.4** | **19439** | **50.4** | **7837** | **20.3** | **3403** | **8.8** | **38536** | **1.0** |
| Chronic kidney disease | 2458 | 22.2 | 4160 | 37.6 | 3013 | 27.2 | 1429 | 12.9 | 11060 |  |
| Urinary incontinence | 1461 | 8.8 | 8539 | 51.5 | 4634 | 27.9 | 1956 | 11.8 | 16590 |  |
| Endometriosis | 3999 | 35.6 | 6949 | 61.9 | 232 | 2.1 | 45 | 0.4 | 11225 |  |
|  |  |  |  |  |  |  |  |  |  |  |
| **Sensory organs** | **8480** | **5.7** | **34071** | **22.8** | **56111** | **37.5** | **50903** | **34.0** | **149565** | **3.6** |
| Glaucoma | 609 | 3.6 | 3718 | 22.2 | 6344 | 37.8 | 6095 | 36.4 | 16766 |  |
| Blindness/low vision | 139 | 13.7 | 261 | 25.7 | 256 | 25.2 | 358 | 35.3 | 1014 |  |
| Loss of hearing | 5822 | 4.6 | 26288 | 20.7 | 48951 | 38.5 | 45931 | 36.2 | 126992 |  |
| Psoriasis | 1966 | 24.6 | 4060 | 50.8 | 1560 | 19.5 | 414 | 5.2 | 8000 |  |

Prevalence is presented as numbers (N) and percentages (%).

* 1st January, 2000

† The groups are not mutually exclusive hence a person can appear in more than one diagnosis group.

‡ Include all patients registered in the Danish Psychiatric Central Research Register (PCRR) (including alcohol and dementia) and diagnoses for alcohol and dementia from the Danish National Patient Register (NPR). The two groups of alcohol and dementia are based on data from both PCRR and NPR.
